# Supplementary material
Source: PubMed Central journal article supplement (PMC9535754)
Supplement: EMBR-23-e54859-s002.pdf [file EMBR-23-e54859-s002.pdf]

## Expanded View Figures

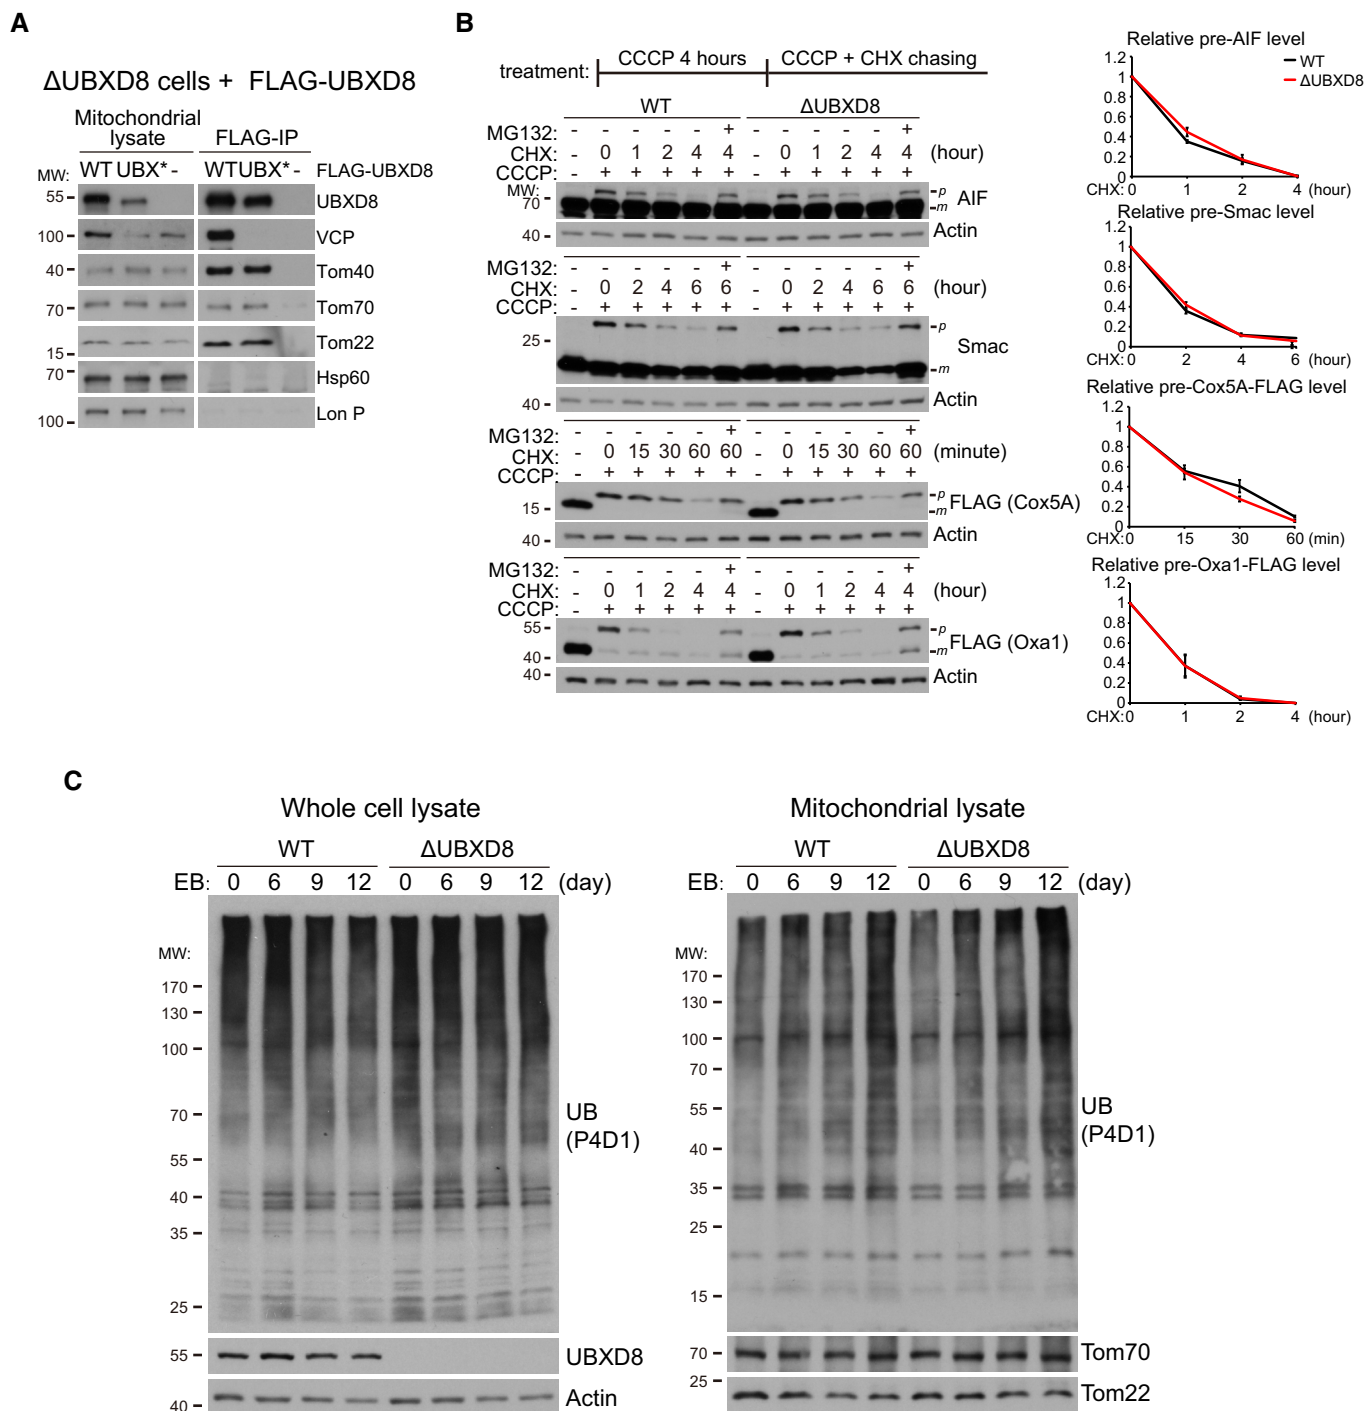

Figure EV1.

**Figure EV1. UBXD8 associates with the TOM complex but is dispensable for translocation-associated degradation. Related to Fig 2.**

- A Immunoprecipitation analysis of the interaction between UBXD8 and the TOM complex. Mitochondrial fractions were purified from the indicated HeLa cells and lysed with lysis buffer containing 1% digitonin. Mitochondrial lysates were then subjected to anti-FLAG immunoprecipitation.
- B Western blot and quantitative analysis of translocation-associated degradation with four model substrates: Aif, Smac, Cox5A-FLAG, and Oxa1-FLAG. WT and  $\Delta$ UBXD8 HeLa cells were treated with 15  $\mu$ M CCCP for 4 h and then subjected to CCCP + CHX (200  $\mu$ g/ml) chasing for the indicated time. Cox5A-FLAG and Oxa1-FLAG expression were induced by Doxycycline (1  $\mu$ g/ml) for 4 h. MG132: 20  $\mu$ M. Data are shown as mean  $\pm$  SE from three biological repeats.
- C Western blot analysis of mitochondrial ubiquitination induced by mtDNA depletion (EB treatment) in WT and  $\Delta$ UBXD8 HeLa cells. Cells were treated with EB (50 ng/ml) plus uridine (50  $\mu$ g/ml), pyruvate (1 mM), and glutamine (2 mM) for the indicated time. Whole cell lysates and mitochondrial fraction lysates were analyzed.
- Source data are available online for this figure.

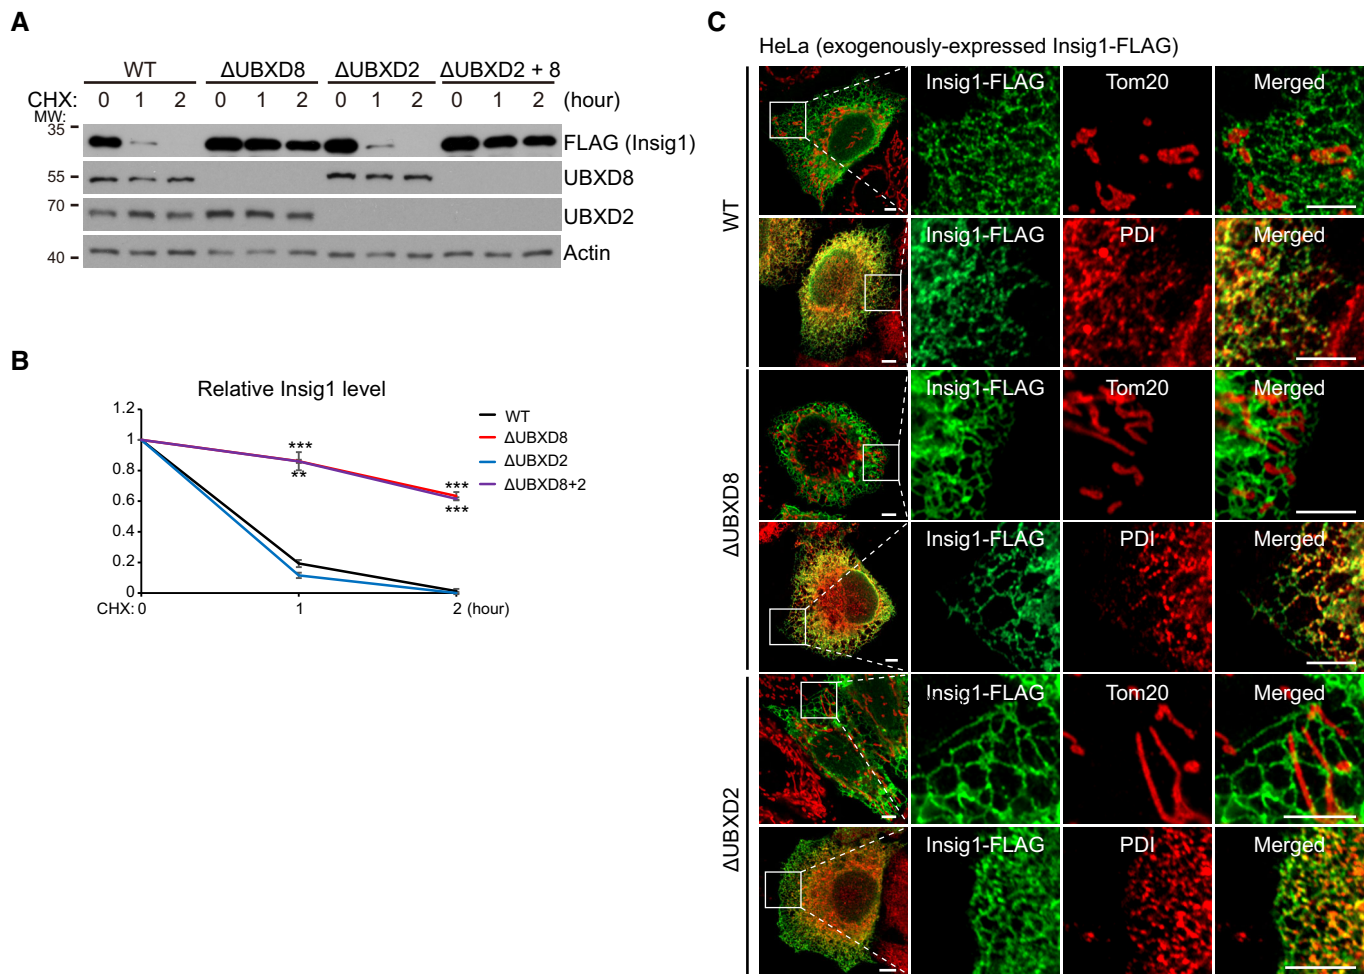**Figure EV2. The degradation and subcellular localization of Insig1-FLAG. Related to Fig 4.**

- A, B Western blot (A) and quantitative analysis (B) of Insig1-FLAG degradation in the indicated HeLa cells. Data are shown as mean  $\pm$  SE from three biological repeats (B). Statistics: two-tailed unpaired Student's *t*-test (B); \*\*\**P* < 0.001.
- C Immunofluorescence analysis of Insig1-FLAG localization in the indicated HeLa cells. Scale bar, 5  $\mu$ m.
- Source data are available online for this figure.

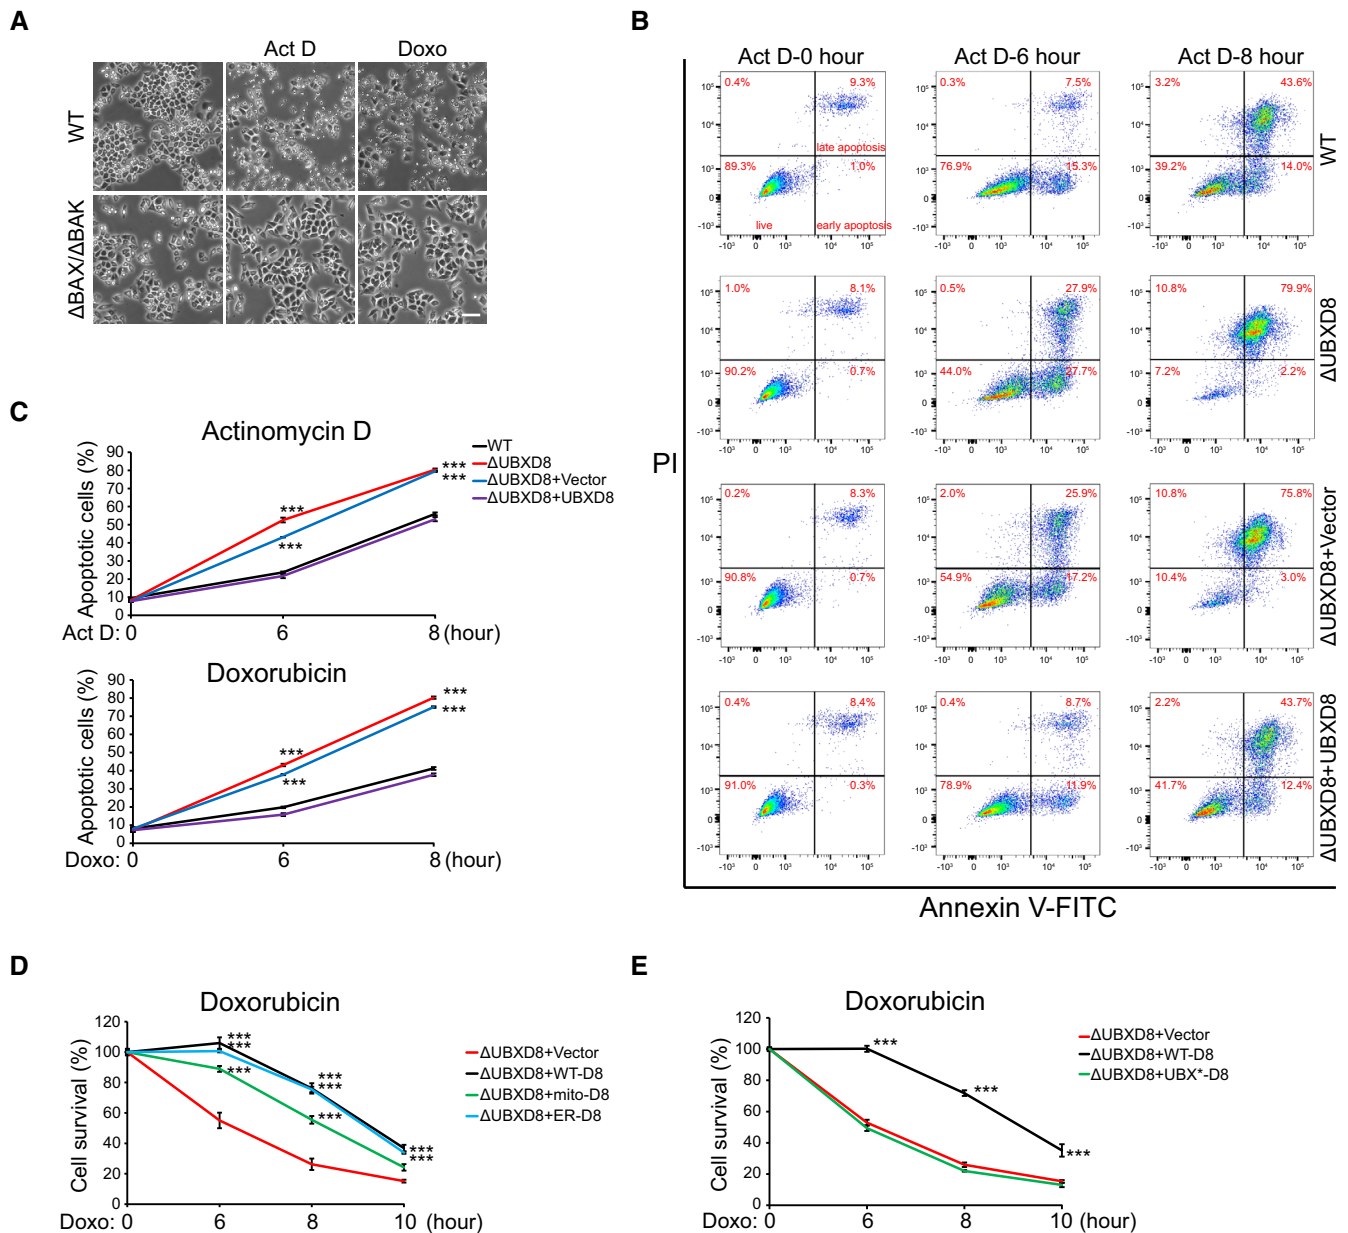

**Figure EV3. UBXD8 knockout sensitizes cells to apoptotic insults. Related to Fig 5.**

A Representative images of WT and  $\Delta$ BAX  $\Delta$ BAK HeLa cells treated with ActD and Doxo. Scale bar, 100  $\mu$ m.  
 B, C Representative FACS (B) and quantitative analysis (C) of apoptosis in the indicated HeLa cells treated with ActD or Doxo.  
 D, E Quantitative analysis of apoptosis in the indicated HeLa cells treated with Doxo.

Data information: Data are shown as mean  $\pm$  SE from three biological repeats (C–E). Statistics: two-tailed unpaired Student's *t*-test (C–E); \*\*\**P* < 0.001.

**Figure EV4. The mRNA level and the degradation of Noxa, Bnip3, and Bik. Related to Fig 6.**

A Quantitative PCR analysis of the mRNA levels of Noxa, Bnip3, and Bik in the indicated HeLa cells. Data are shown as mean  $\pm$  SE from three biological repeats.  
 B–G Representative western blot (B, D, F) and quantitative analysis (C, E, G) of the degradation of Mcl1, Noxa, Bnip3, and Bik in the indicated HeLa cells. In (F), VCP knockdown was induced by Doxycycline (1  $\mu$ g/ml) treatment for 48 h. Data are shown as mean  $\pm$  SE from three biological repeats (C, E, G). Statistics: two-tailed unpaired Student's *t*-test (C, E, G); \**P* < 0.05, \*\**P* < 0.01, \*\*\**P* < 0.001.

Source data are available online for this figure.

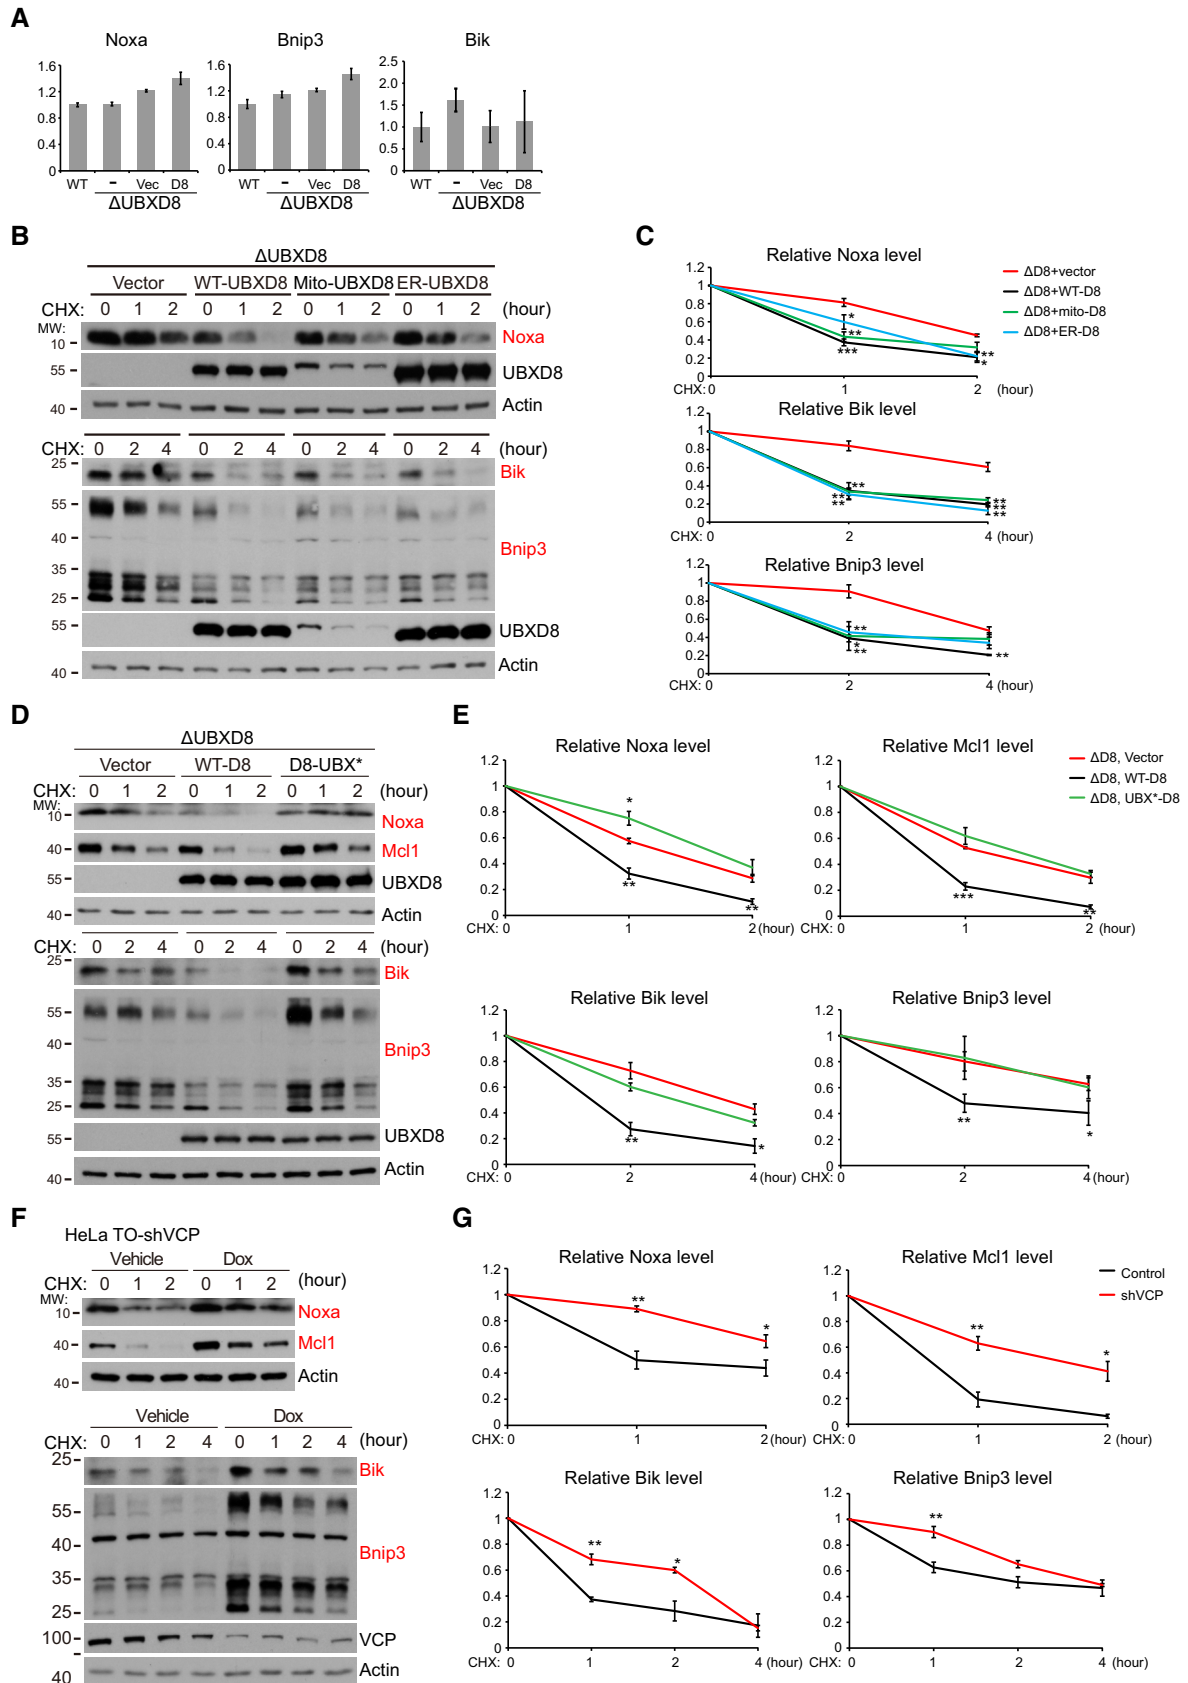

Figure EV4.

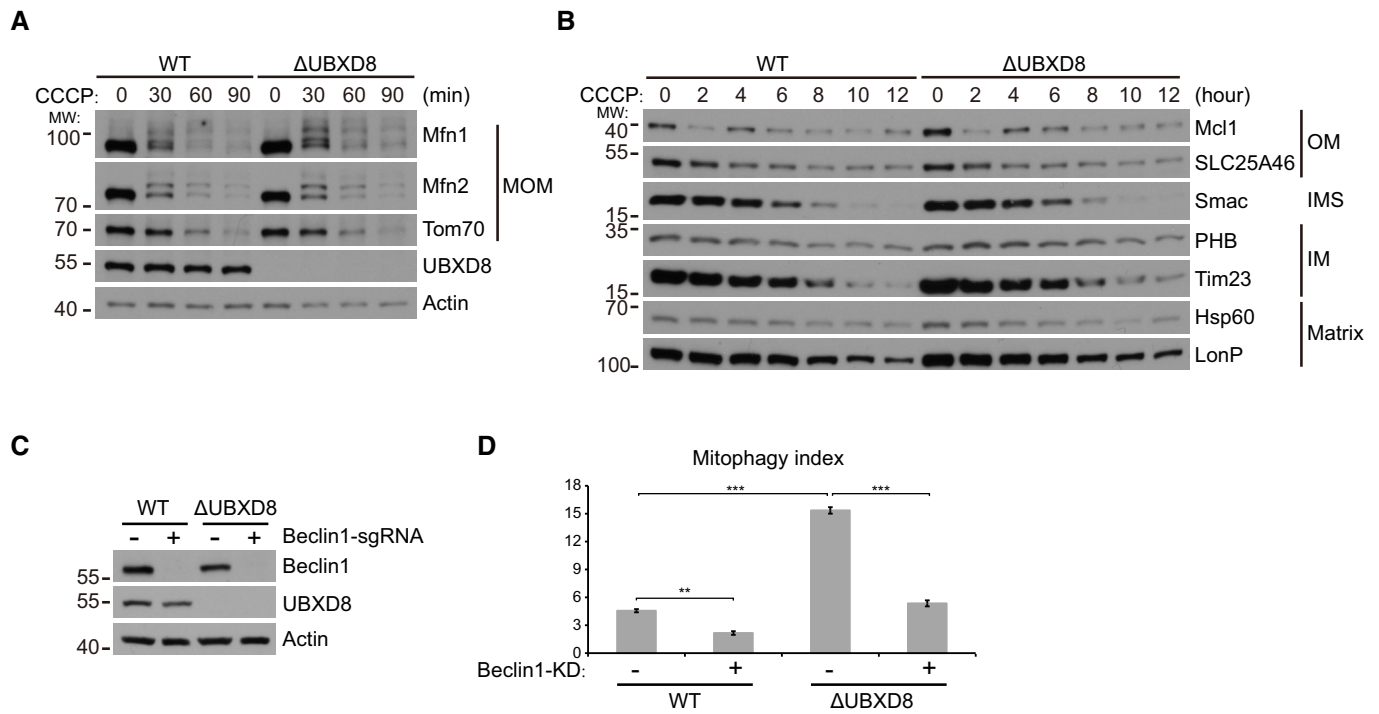

**Figure EV5. UBXD8 is dispensable for Parkin-mediated mitochondrial degradation and Beclin1 knockdown blocks hyperactivated mitophagy in  $\Delta$ UBXD8 cells. Related to Fig 7.**

A, B HeLa cells stably expressing GFP-Parkin were treated with CCCP (15  $\mu$ M) for the indicated time. The degradation of mitochondrial outer membrane (MOM), inter-membrane space (IMS), inner membrane (IM), and matrix proteins were analyzed by western blot.

C Western blot analysis of Beclin1 knockdown in the indicated HeLa cells.

D Quantitative analysis of mitophagy in the indicated HeLa cells. Data are shown as mean  $\pm$  SE from three biological repeats. Statistics: one-way ANOVA; \*\* $P < 0.01$ , \*\*\* $P < 0.001$ .

Source data are available online for this figure.
