# Supplementary material
Source: PubMed Central journal article supplement (PMC9535754)
Supplement: EMBR-23-e54859-s006.pdf [file EMBR-23-e54859-s006.pdf]

## **Appendix**

Appendix Table S1. cDNAs and plasmids used in this study.----- 2

Appendix Table S2. Oligonucleotides used in this study.----- 3-4

**Appendix Table S1. cDNAs and plasmids used in this study.**

| <b>RESOURCE</b>                                                 | <b>SOURCE</b> | <b>IDENTIFIER</b> |
|-----------------------------------------------------------------|---------------|-------------------|
| <b>Complementary DNA</b>                                        |               | <b>Refseq</b>     |
| Human <i>UBXD8</i>                                              | This paper    | NM_014613.3       |
| Human <i>UBXD2</i>                                              | This paper    | NM_014607.4       |
| Human <i>UBXD6</i>                                              | This paper    | NM_005671.4       |
| Human <i>BIK</i>                                                | This paper    | NM_001197.5       |
| Human <i>MARCH5</i>                                             | This paper    | NM_017824.5       |
| Human <i>MULAN</i>                                              | This paper    | NM_024544.3       |
| Human <i>RNF185</i>                                             | This paper    | NM_152267.4       |
| Human <i>PARKIN</i>                                             | This paper    | NM_004562.3       |
| Human <i>COX5A</i>                                              | This paper    | NM_004255.4       |
| Human <i>OXA1</i>                                               | This paper    | NM_005015.5       |
| Human <i>INSIG1</i>                                             | This paper    | NM_005542.6       |
| Human <i>MID49</i>                                              | This paper    | NM_139162.4       |
| <b>Recombinant DNA</b>                                          |               |                   |
| Plasmid: pSpCas9(BB)-2A-GFP (PX458)                             | Addgene       | Cat# 48138        |
| Plasmid: psPAX2                                                 | Addgene       | Cat# 12260        |
| Plasmid: pMD2.G                                                 | Addgene       | Cat# 12259        |
| Plasmid: pLVX-neo-3FLAG-UBXD8                                   | This paper    | N/A               |
| Plasmid: pLVX-neo-3FLAG-UBXD6                                   | This paper    | N/A               |
| Plasmid: pLVX-neo-3FLAG-UBXD2                                   | This paper    | N/A               |
| Plasmid: pLVX-neo-3FLAG-UBXD8-UBX*<br>(K367A,F407A,P408G,R409A) | This paper    | N/A               |
| Plasmid: pLVX-neo-3FLAG-BIK                                     | This paper    | N/A               |
| Plasmid: pBM16A-FLAG-UBXD8 KI-Donor                             | This paper    | N/A               |
| Plasmid: FUIPW-UBXD8                                            | This paper    | N/A               |
| Plasmid: FUIPW-Mito-UBXD8 (FZO1-702-761 aa)                     | This paper    | N/A               |
| Plasmid: FUIPW-ER-UBXD8 (UBXD2-406-438 aa)                      | This paper    | N/A               |
| Plasmid: FUIPW-3HA-MARCH5                                       | This paper    | N/A               |
| Plasmid: FUIPW-3HA-MULAN                                        | This paper    | N/A               |
| Plasmid: FUIPW-3HA-RNF185                                       | This paper    | N/A               |
| Plasmid: FUIPW-mEGFP-PARKIN                                     | This paper    | N/A               |
| Plasmid: pLENTI-TO-COX5A-3FLAG                                  | This paper    | N/A               |
| Plasmid: pLENTI-TO-OXA1-3FLAG                                   | This paper    | N/A               |
| Plasmid: pLENTI-TO-mitoKeima                                    | This paper    | N/A               |
| Plasmid: pCDNA3.1-INSIG1-3FLAG                                  | This paper    | N/A               |
| Plasmid: pLVX-neo-INSIG1-3FLAG                                  | This paper    | N/A               |
| Plasmid: FUIPW-MID49-3FLAG                                      | This paper    | N/A               |

**Appendix Table S2. Oligonucleotides used in this study.**

|                                          |                           |
|------------------------------------------|---------------------------|
| <i>MARCH5</i> knockout primers (human)   |                           |
| Fwd-ATCCACCCAGCGTTGTAGAC                 | Rev-GTCTACAACGCTGGGTGGAT  |
| <i>UBXD8</i> knockout primers-1 (human)  |                           |
| Fwd-GAGGAGCGGGATCTAACCCA                 | Rev-TGGGTTAGATCCCGCTCCTC  |
| <i>UBXD8</i> knockout primers-2 (human)  |                           |
| Fwd-TCTCACTGGCATCGAATCTA                 | Rev-TAGATTCGATGCCAGTGAGA  |
| <i>UBXD2</i> knockout primers-1 (human)  |                           |
| Fwd-CCGCCATCGCGACGGCCAAA                 | Rev-TTGCCGTCGCGATGGCGG    |
| <i>UBXD2</i> knockout primers-2 (human)  |                           |
| Fwd-GCTCCTTTTGGCCGTCGCGA                 | Rev-TCGCGACGGCCAAAAGGAGC  |
| <i>UBXD6</i> knockout primers (human)    |                           |
| Fwd-TGTGTCTGGAGCTCCGGCGT                 | Rev-ACGCCGGAGCTCCAGACACA  |
| <i>NOXA</i> knockout primers-1 (human)   |                           |
| Fwd-ACGCTCAACCGAGCCCCGCG                 | Rev-CGCGGGGCTCGGTTGAGCGT  |
| <i>NOXA</i> knockout primers-2 (human)   |                           |
| Fwd- TCGAGTGTGCTACTCAACTC                | Rev-GAGTTGAGTAGCACACTCGA  |
| <i>BIK</i> knockout primers-1 (human)    |                           |
| Fwd- GCCAAGAACCTCCATGGTTCG               | Rev-CGACCATGGAGGTTCTTGGC  |
| <i>BIK</i> knockout primers-2 (human)    |                           |
| Fwd-GTCCATCTCGTCCCCGATGC                 | Rev-GCATCGGGGACGAGATGGAC  |
| <i>BNIP3</i> knockout primers-1 (human)  |                           |
| Fwd-TTCAGCAATAATGGGAACGG                 | Rev-CCGTTCCCATATTGCTGAA   |
| <i>BNIP3</i> knockout primers-2 (human)  |                           |
| Fwd-ATGGGATTGGTCAAGTCGGC                 | Rev-GCCGACTTGACCAATCCCAT  |
| <i>VCP</i> knockdown primers (human)     |                           |
| Fwd-CACAGTGTGCTGAAAGGAAA (shRNA)         | Rev-TTTCCTTTCAGCAAACTGTG  |
| <i>BECLIN1</i> knockdown primers (human) |                           |
| Fwd-ATCTGCGAGAGACACCATCC (sgRNA)         | Rev-GGATGGTGTCTCTCGCAGAT  |
| <i>BAX</i> knockout primers-1 (human)    |                           |
| Fwd-TCGGAAAAGACCTCTCGGG                  | Rev-CCCGAGAGGTCTTTTCCGA   |
| <i>BAX</i> knockout primers-2 (human)    |                           |
| Fwd-GTTCCGGCACCTTGGTGAC                  | Rev-GTGCACCAAGGTGCCGGAAC  |
| <i>BAK</i> knockout primers-1 (human)    |                           |
| Fwd-ACGGCAGCTCGCCATCATCG                 | Rev-CGATGATGGCGAGCTGCCGT  |
| <i>BAK</i> knockout primers-2 (human)    |                           |
| Fwd-GTTGATGTCGTCCCCGATGA                 | Rev-TCATCGGGGACGACATCAAC  |
| <i>MARCH5</i> knockout check primers     |                           |
| Fwd-ATCCCATTAAGTAAGAGCTGC                | Rev-ATATCCACACAGGTATGCAAG |
| <i>UBXD6</i> knockout check primers      |                           |
| Fwd-GTCCCCCTCAATAACGACAC                 | Rev-TGCCTCTACCCTCTTACACG  |
| <i>FLAG-UBXD8</i> knockin check primers  |                           |

|                             |                           |
|-----------------------------|---------------------------|
| Fwd-GAGCTTCTCGAGGCACATTCG   | Rev-TGTCAGAGACCCGAAATGACG |
| <i>NOXA</i> qPCR primers    |                           |
| Fwd-GGAGATGCCTGGGAAGAAG     | Rev-TGCCGGAAGTTCAGTTTGTC  |
| <i>BIK</i> qPCR primers     |                           |
| Fwd-CTGGGTCTGGCTTTCATCTAC   | Rev-CTGTTTCGCAGGACACCC    |
| <i>BNIP3</i> qPCR primers   |                           |
| Fwd-GTTCCAGCCTCGGTTTCTATT   | Rev-AGCTCTGTTGGTATCTTGTG  |
| <i>ACTIN B</i> qPCR primers |                           |
| Fwd-ACCTTCTACAATGAGCTGCG    | Rev-CCTGGATAGCAACGTACATGG |
