# Supplementary material
Source: PubMed Central journal article supplement (PMC9535754)

Fig 6A

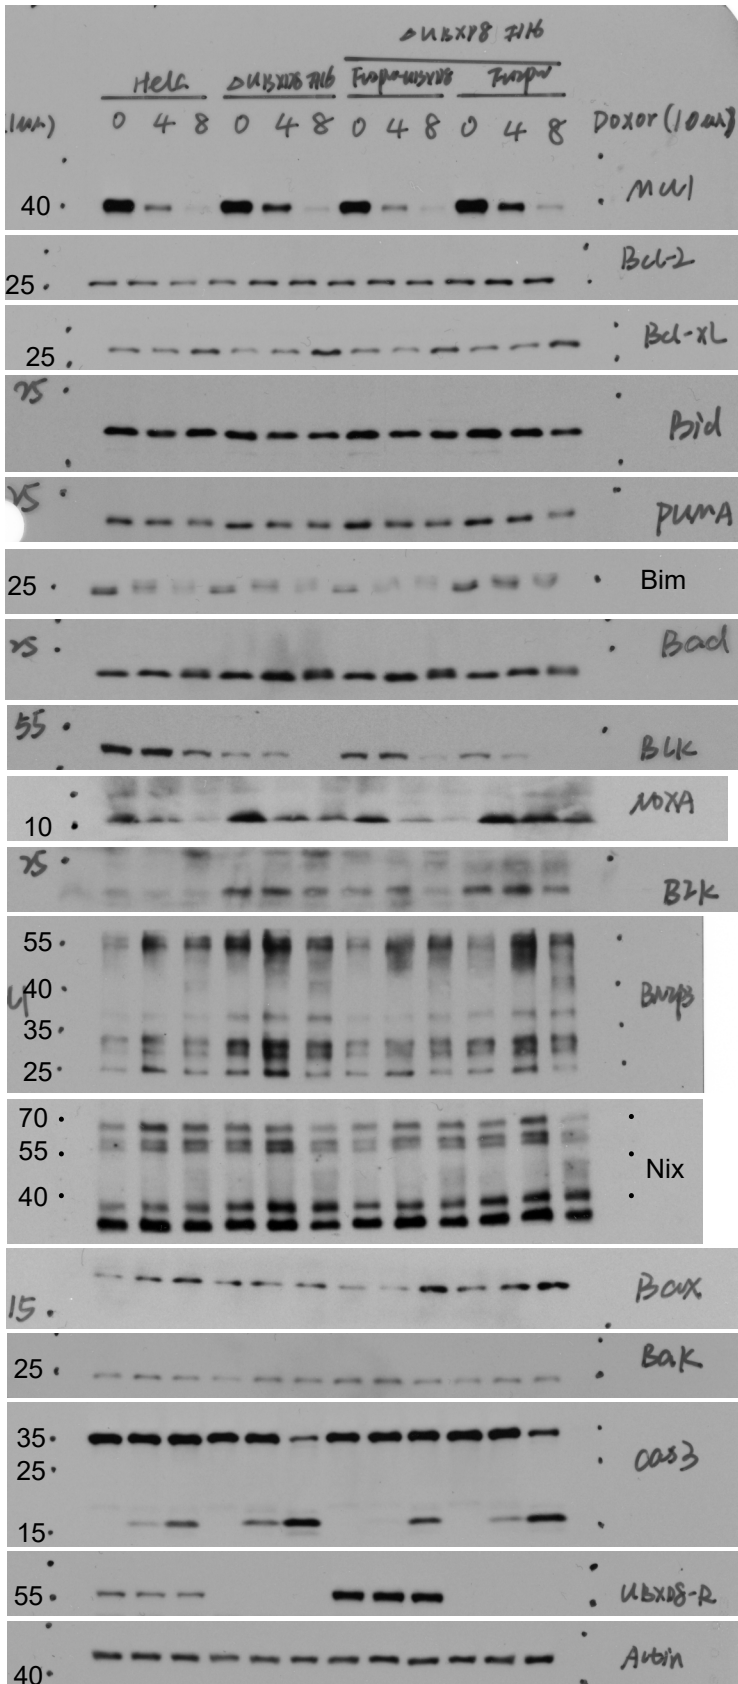

Fig 6B

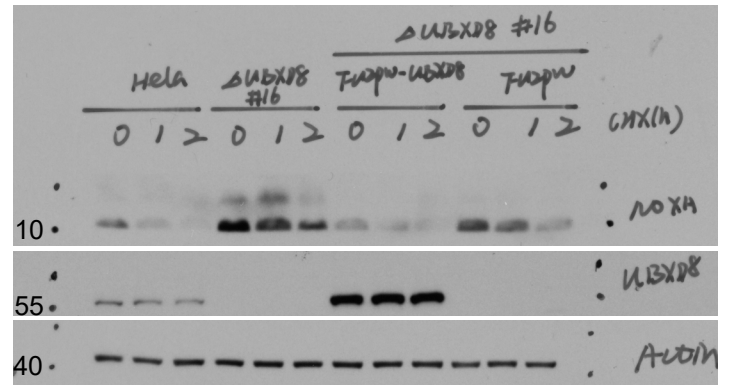

Fig 6C

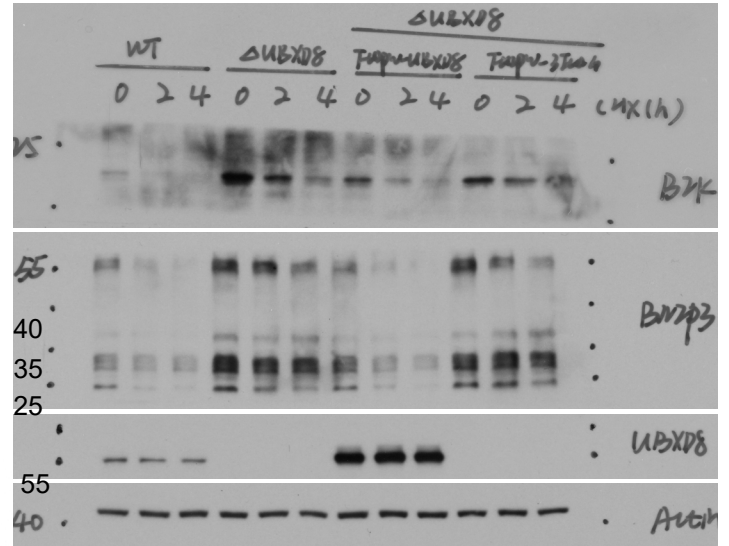

Fig 6D

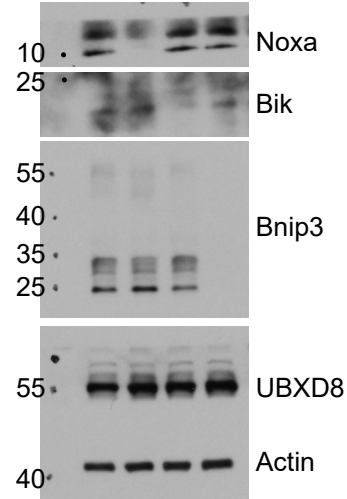

Fig 6F

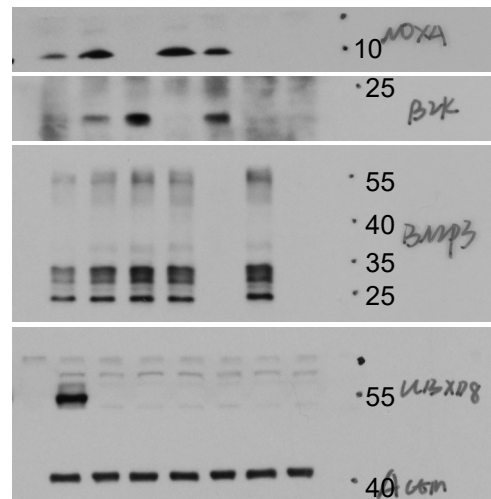

Supplement: EMBR-23-e54859-s005.pdf [file EMBR-23-e54859-s005.pdf]
